# Supplementary material
Source: Springer Nature journal article supplement (https://www.springermedizin.de/resource/supplementary/13048_2008_3_MOESM3_ESM.pdf/9664700)

**A**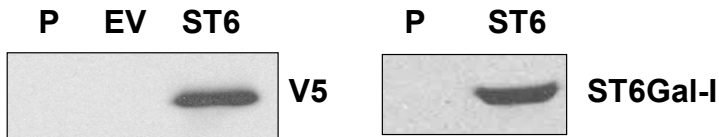**B**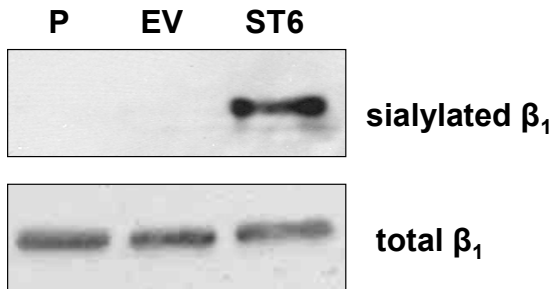

Supplement: MOESM3 [file 9664700]
